# Supplementary material for: Reverse genetics in high throughput: rapid generation of complete negative strand RNA virus cDNA clones and recombinant viruses thereof
Source: PubMed Central journal article supplement (PMC4820695; doi:10.1038/srep23887), 2016-04-05
Supplement: srep23887-s1.pdf [file srep23887-s1.pdf]

**Reverse genetics in high throughput: rapid generation of complete negative strand RNA virus cDNA clones and recombinant viruses thereof.**

<sup>1</sup>NOLDEN T, <sup>2</sup>PFÄFF F, <sup>1</sup>NEMITZ S, <sup>1</sup>FREULING CF, <sup>2</sup>HOEPER D, <sup>1</sup>MUELLER T AND <sup>1\*</sup>STEFAN FINKE

<sup>1</sup>Friedrich-Loeffler-Institut, Federal Research Institute for Animal Health, Institute of Molecular Virology and Cell Biology, D-17493 Greifswald – Insel Riems, Germany

<sup>2</sup>Friedrich-Loeffler-Institut, Federal Research Institute for Animal Health, Institute of Diagnostic Virology, D-17493 Greifswald – Insel Riems, Germany

## Supplementary Figure S1

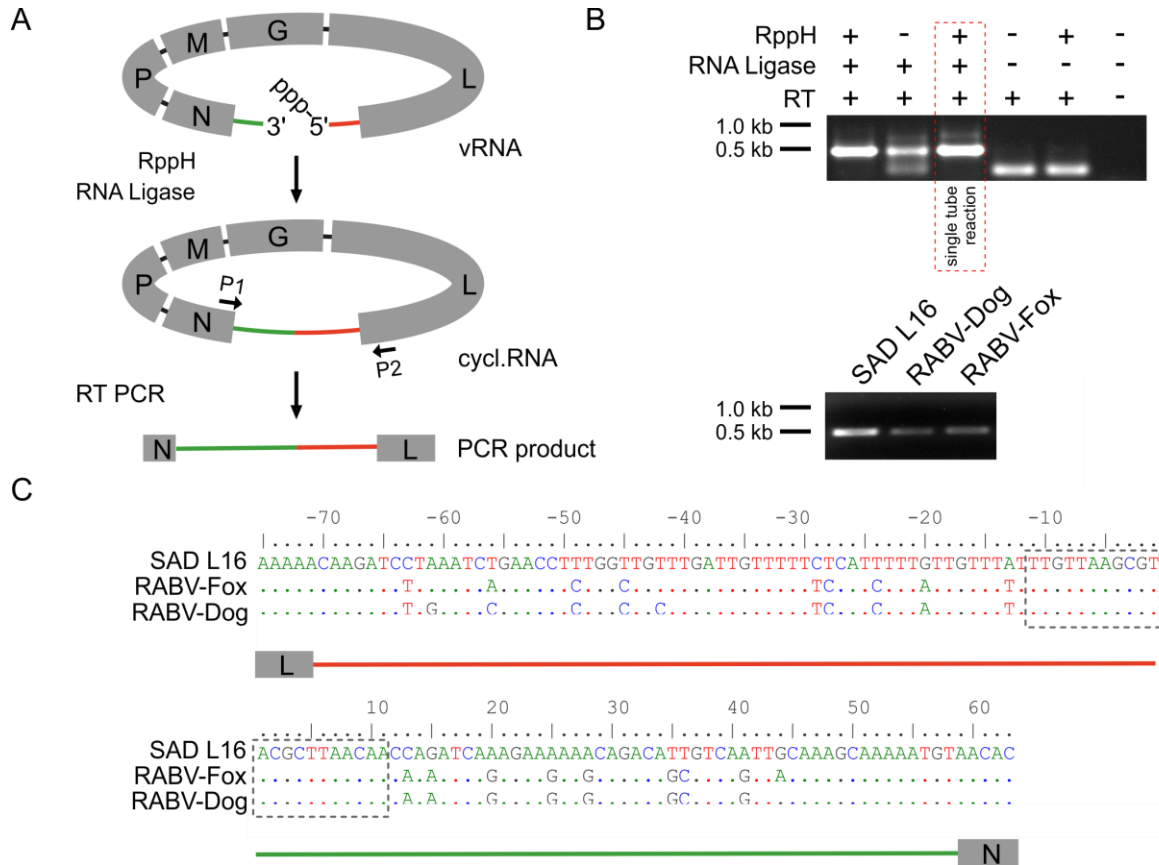

### Determination of virus leader and trailer sequences by RNA T4 ligase-mediated endjoining

(A) Schematic presentation of T4-RNA mediated RNA end-joining for determination of virus end-sequences. The oligonucleotide L16endseq (P2) was used for priming the reverse transcriptase reaction before amplification and sequencing of the PCR product spanning the RNA ligation site. (B) RT-PCR products of T4-RNA ligase-mediated end-joining. Positive RT-PCR signals were obtained, when RppH digestion was performed as separate reaction or as in a single tube reaction together with T4-RNA ligase (lane1 and lane3, respectively). Without removing 5' triphosphate, RNA end-joining was less effective (lane 2). No PCR products were obtained when T4 RNA ligase or reverse transcriptase was absent (lane 4, 5 and lane 6, respectively). (C) Sequence alignment of SAD L16, RABV-Dog and RABV-Fox end-sequences. For reference SAD B19 leader and trailer sequences were concatenated.

## Supplementary Figure S2

A

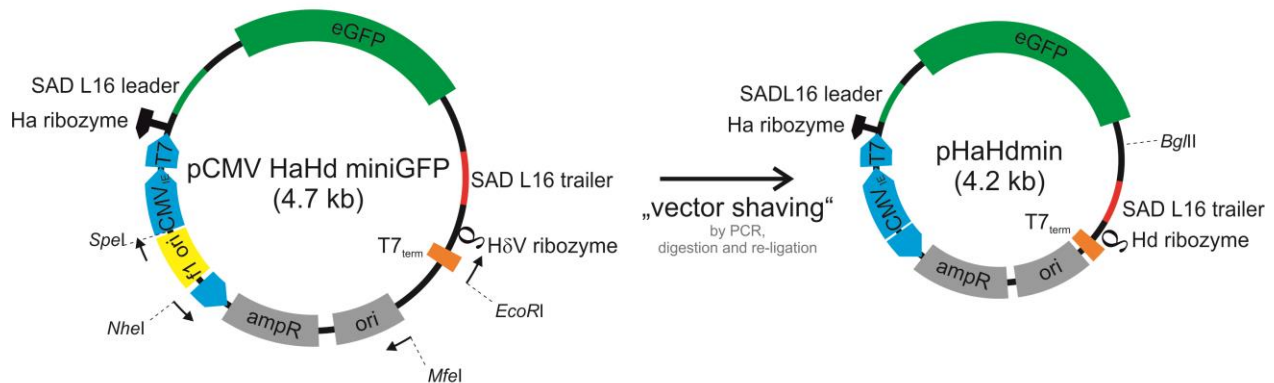

B

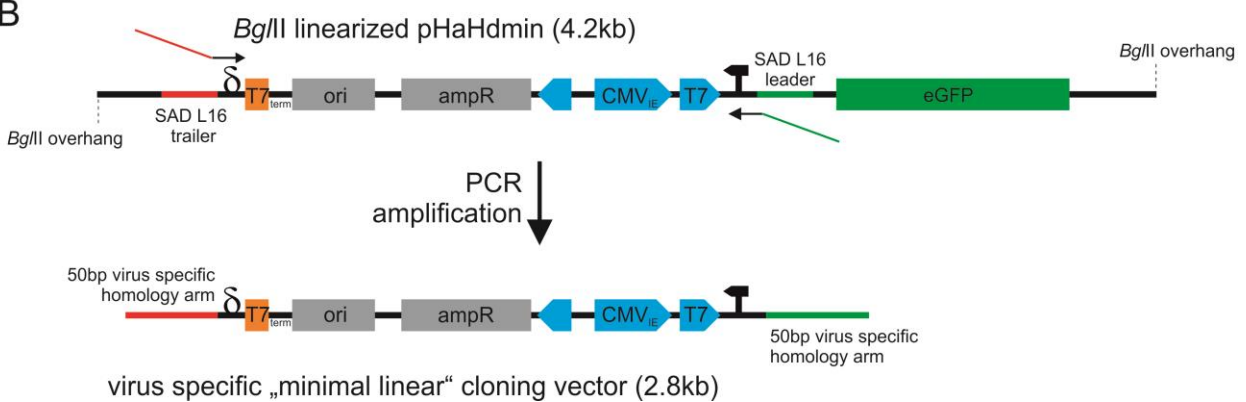

### Construction of pHaHdmin and PCR amplification of a linear minimal cloning vector.

(A) pHaHdmin was generated by amplification of two PCR fragments from pCMV HaHd miniGFP and re-ligation via *SpeI* / *NheI* and *MfeI* / *EcoRI* compatible ends introduced by the 5' ends of the PCR oligonucleotides (indicated by arrows). The "vector shaving" decreases the size of the minimal linear cloning vector amplified from pHaHdmin by PCR and reduces the possibility of intramolecular recombination in subsequent steps of RecE/T recombinering. The 50bp homology arms, compatible to RABV leader (green) and trailer (red) sequences were introduced by the pHaHdmin-specific oligonucleotides which binds within the ribozyme sequences of the vector pHaHdmin (B). Promotor sequences, that drives virus cDNA and ampR gene transcription are colored blue; CMV<sub>IE</sub>, Cytomegalievirus imidiate early promotor; T7 and T7<sub>term</sub>, promotor and terminator signal sequences of T7 bacteriophage; ori, origin of replication.

## Supplementary Figure S3

### A G/L intergenic region of pRABV-Dog

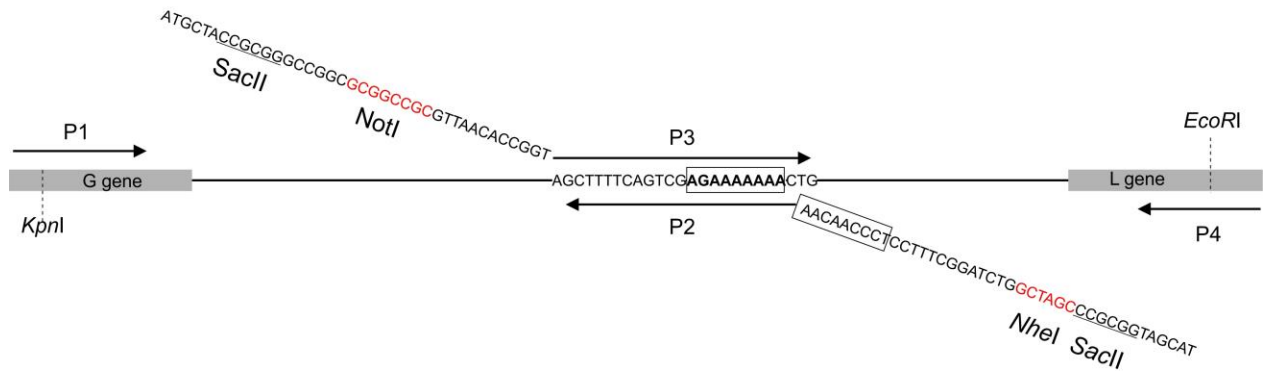

### B G/L intergenic region of pRABV-Dog MCS

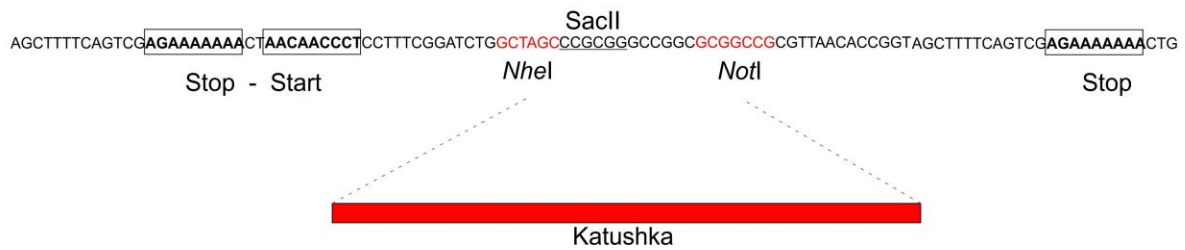

**Insertion of the MCS with an additional RABV Start-Stop signal and the fluorescent marker Katushka into pRABV-Dog and pRABV-Fox.** The G/L intergenic region of pRABV-Dog (A) was amplified with primer pairs P1/P2 and P3/P4 (see Supplementary Table S3). Generated PCR products were concatenated using the *SacII* site within the primer 5' overhangs (underlined). The resulting product with an additional stop-start signal (framed) was re-amplified with P1 and P4 and subsequently cloned into pRABV-Dog via *KpnI/EcoRI* to yield pRABV-Dog MCS (B). The fluorescent marker Katushka from pSAD L16 Katushka (unpublished) was inserted in a second step into pRABV-Dog MCS via *NheI* and *NotI* sites (in red). pRABV-Fox Katushka was constructed in a similar strategy was used (see material and methods section).

# Supplementary Figure S4

A

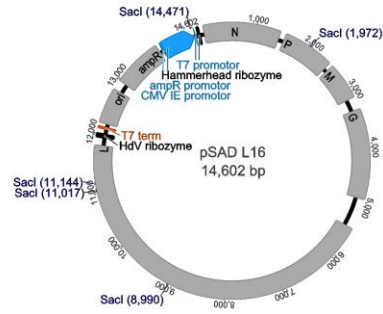

|          | Fragment start | Fragment end | Fragment length |
|----------|----------------|--------------|-----------------|
| pSAD L16 | 1972           | 8989         | 7018            |
|          | 8990           | 11016        | 2027            |
|          | 11017          | 11143        | 127             |
|          | 11144          | 14470        | 3327            |
|          | 14471          | 1971         | 2103            |

B

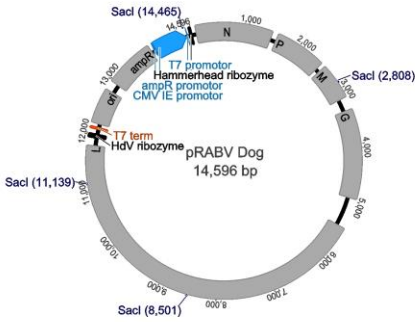

|           | Fragment start | Fragment end | Fragment length |
|-----------|----------------|--------------|-----------------|
| pRABV Dog | 2808           | 8500         | 5693            |
|           | 8501           | 11138        | 2638            |
|           | 11139          | 14464        | 3326            |
|           | 14465          | 2807         | 2939            |

C

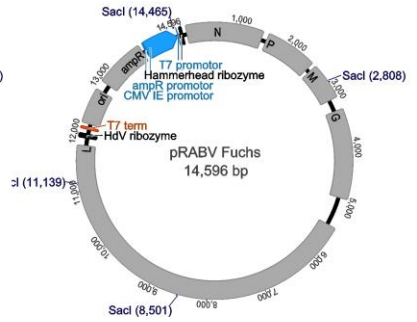

|             | Fragment start | Fragment end | Fragment length |
|-------------|----------------|--------------|-----------------|
| pRABV Fuchs | 2808           | 8500         | 5693            |
|             | 8501           | 11138        | 2638            |
|             | 11139          | 14464        | 3326            |
|             | 14465          | 2807         | 2939            |

## Supplementary Table S4

### pCMVHAHd GFPmini "vector Shaving"

| primer        | sequence                                  | comment                    |
|---------------|-------------------------------------------|----------------------------|
| miniP-CMV-for | CGTTGACATTGATTATTGAC                      |                            |
| miniP-EcoRI-R | ATCGTGG <u>GAATTC</u> ATATAGTTCCTCCTTCAGC |                            |
| miniP-MfeI-F  | ATCGTGCAATTGAGGCCAGCAAAGGCCAGGA           | restriction sites, underli |
| miniP-NheI-R  | ATCGTG <u>GCTAGC</u> AAATACATTCAAATATGTAT |                            |

### RABV long range PCR

| primer   | sequence                                  | comment             |
|----------|-------------------------------------------|---------------------|
| B19-for  | tcgatccgggtcagccttaacaaccagatca           |                     |
| B19-rev  | taatacacctgcccattgccgaccagccttaacaataaaca |                     |
| RABV-for | tcgatccgggtcACGCTTAACAACAAATCA            | leader/trailer, red |
| RABV-rev | taatacacctgcccattgccgaccACGCTTAACAAAAAACA |                     |

### Katushka cloning

| primer              | sequence                                                                | comment                   |
|---------------------|-------------------------------------------------------------------------|---------------------------|
| Dog-MCS-for (P3)    | ATGCTA <u>CCGCGGGCCGCGCGCGCGGCGTTAAC</u> ACCGGTAGCTTTTCAGTCGAGAAAAAACTG |                           |
| Dog-MCS-rev (P2)    | ATGCTA <u>CCGCGGGCTAGC</u> CAGATCCGAAAGGAGGGTTGTTAGTTTTTTCTCGACTGAAAAGC | SacI underlined, MCS in i |
| Dog-KpnI-for (P1)   | TCCAGGAACTGGTACCAAAGG                                                   |                           |
| Dog-EcoRI-rev (P4)  | CCTCGGGGGGAATTCCAACCCTC                                                 |                           |
| Fox-Eco72I-rev (P5) | GAGTTCCACACGTGGACAAG                                                    |                           |

### Batai Virus specific endsequencing and LLHR

| primer              | sequence                                                        | comment         |
|---------------------|-----------------------------------------------------------------|-----------------|
| BATV L ital 6667 fw | CATAGAGAAGACTATATTCC                                            | endsequencing   |
| BATV L ital 213 rv  | TATCTAGAATAATCTCATCC                                            | endsequencing   |
| BATV-Lseg-for       | CGGAGTCCC GGTCAGTAGTGTACTACCGATAC                               | full genome PCR |
| BATV-Lseg-rev       | CCCAGGTCGGACCGGAGGAGGTGGAGATGCCATGCCGACCCAGTAGTGTGCTACCGATATAAT | full genome PCR |

|                |                                                                                                                         |                        |
|----------------|-------------------------------------------------------------------------------------------------------------------------|------------------------|
| BATV Tr-for    | CCATAGAACAGCATTAAAGATCAATTTCTTTTATATAGGAGCACACTACTGGGTCGGCATGGCATCTCCACC                                                | pHaHdmin amplification |
| BATV Le-rev    | ATTTTATTGATGAATTTTATTGTAATTTCTTTATATAGGAGTACACTACTGACCCGGGACTCCGGGTTTCGTCCTCACGGACTCATCAGAGTAGTGTGCGGCCGCCCTATAGTGAGTCG | pHaHdmin amplification |
| BATV L 1300 fw | TAATACGTGCCAATCCAC                                                                                                      |                        |
| BATV L 1401 rv | GCAAATTTATCCAATAGC                                                                                                      |                        |
| BATV L 1898 fw | GTCAAATTCACCTTAAATC                                                                                                     |                        |
| BATV L 2498 fw | TAACACCTTTAGGGTGGC                                                                                                      |                        |
| BATV L 3101 fw | AGAGTCTATATGGTTTCC                                                                                                      |                        |
| BATV L 3605 fw | ACTAACTAAGAAGATACC                                                                                                      |                        |
| BATV L 4177 fw | TTGCAAATATCCTTGATC                                                                                                      |                        |
| BATV L 4800 fw | CTCAATTATCTCCCTTTC                                                                                                      |                        |
| BATV L 5400 fw | TATAGTAGTATCTTTGAC                                                                                                      | Sequencing primer      |
| BATV L 6001 fw | ATTTTGCACCTTAATAC                                                                                                       |                        |
| BATV L 6600 fw | TTAGATGATAAGTACAAC                                                                                                      |                        |
| BATV L 7179 fw | GTATCAAAATTGGTAACC                                                                                                      |                        |
| BATV L 7551 fw | ATGAATAAGAAGCCAAC                                                                                                       |                        |
| BATV L rv 4932 | GTTTCTCGTTGTTTGTC                                                                                                       |                        |
| BATV L 2083 rv | ACAAAACAAGTGCATTGCC                                                                                                     |                        |
| BATV L 5632 rv | TTGGTTAGCACTTAGTCC                                                                                                      |                        |
